# Supplementary material
Source: PubMed Central journal article supplement (PMC6329985)
Supplement: pnas.1817455116.sapp.pdf [file pnas.1817455116.sapp.pdf]

## Supplementary Information for

Comparing mutagenesis and simulations as tools for identifying functionally important sequence changes for protein thermal adaptation

Ming-ling Liao, George N. Somero, and Yun-wei Dong

Yun-wei Dong  
Email: [dongyw@xmu.edu.cn](mailto:dongyw@xmu.edu.cn)

**This PDF file includes:**

Figs. S1 to S4  
Tables S1 to S6

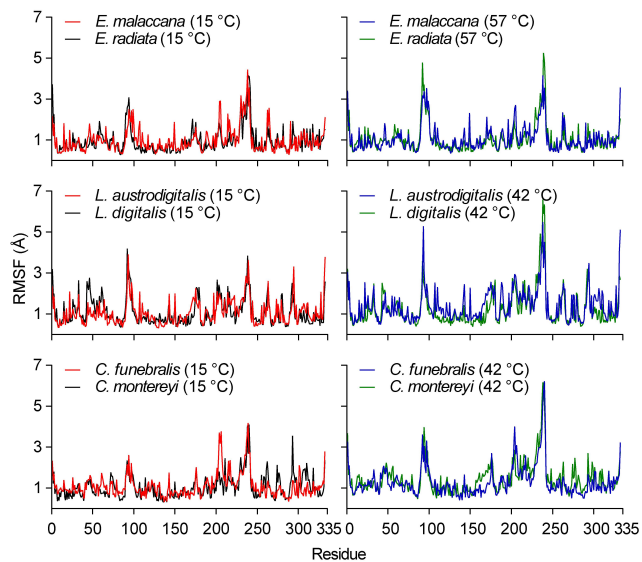

**Fig. S1.** The rms fluctuation (rmsf) for individual residues over the equilibration state (10–20 ns) of cMDHs from *Echinolittorina malaccana*, *E. radiata*, *Lottia austrodigitalis*, *L. digitalis*, *Chlorostoma funebris*, and *C. montereyi*. Simulation temperatures: For genus *Echinolittorina*, 15 °C and 57 °C, and for the other orthologs, 15 °C and 42 °C.

```

wt-Em      MSEPVKVCVTGAAGQIAYSLLYSIAKGDVFGSDQPIILTLLDIAPMEGVNLNGVVMELMDCAMPLLKEVIPTCDEKVAFKDIDAAFLVGAMPRREGMERKD 100
mut-G114S -----G-----
wt-Er      -----S-----
mut-S114G -----S-----

wt-Em      LLAANI K I F K S Q G G A L D T V A K K T V K V V V G N P A N T N A L I C S K Y A P S I P K E N F S C L T R L D Q N R A Q I A A R L G I P N S A V S N V I I W G N H S S T Q F P D V R H A K A 200
mut-G114S -----S-----
wt-Er      -----S-----
mut-S114G -----G-----

wt-Em      I V N G K T V P V P E A V K D D N Y L K N E F L T T V Q K R G G E V I K A R K L S S A M S A A K A T A D H M R D W W F G T Q G D N W V S M G V F S T G A Y G I P E G I M Y S Y P V R I A N K Q W K I V E 300
mut-G114S -----
wt-Er      -----
mut-S114G -----

wt-Em      G L E I N D F A R E K M D L T A K E L C E E R A M A E E I C N Q 332
mut-G114S -----
wt-Er      -----
mut-S114G -----

```

**Fig. S2.** Deduced amino acid sequence alignments of cMDH from two wild types, *Echinolittorina malaccana* (wt-*Em*) and *E. radiata* (wt-*Er*), and two mutants, mut-G114S (glycine mutated to serine at site 114 for the *E. malaccana* ortholog) and mut-S114G (serine mutated to glycine for the *E. radiata* ortholog).

```

wt-Em      MSEPVKVCVTGAAGQIAYSLLYSIAKGDVFGSDQPIILTLDDIAPMEGLNGVVMELMDCAMPLLKEVIPTCDEKVAFKIDIAAFLVGAMPFREGMERKD 100
mut-P4A    --A-----
wt-Lk      --A-----
mut-A4P    --P-----

wt-Em      LLAANIKIFKSGGALDVTAKKTVKVVVGNPANTNALICSKYAPSIKPFNSCLTRLDQNRQAQIAARLGIPINSAVSNVIIWGNHSSTQFPDVRHAKA 200
mut-P4A    -----G-----
wt-Lk      -----A-----
mut-A4P    -----A-----

wt-Em      IVNGKTVPVPEAVKDDNYLKNFLTTVQKRGGEVIKARKLSSAMSAAKATADHMRDWWFGTQGDNWVSMGVFSTGAYGIPGIMYSYPVRIANKQWKIVE 300
mut-P4A    -----
wt-Lk      -----
mut-A4P    -----

wt-Em      GLEINDFAREKMDLTAKELCEERAMAEIICNQ 332
mut-P4A    -----
wt-Lk      -----
mut-A4P    -----

```

**Fig. S3.** Deduced amino acid sequence alignments of cMDH of two wild types, *Echinolittorina malaccana* (wt-*Em*) and *Littorina keenae* (wt-*Lk*), and two mutants, mut-P4A (proline mutated to alanine at site 4 for the *E. malaccana* ortholog) and mut-A4P (alanine mutated to proline for the *L. keenae* ortholog).

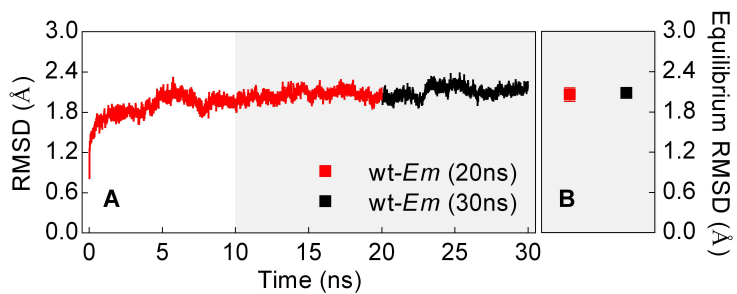

**Fig. S4.** The rmsd of backbone atom positions for the wild type cMDH, *Echinolittorina malaccana* (wt-*Em*) at a simulation temperature of 57 °C. (A): Simulations for 20 ns and 30 ns, respectively. (B): The corresponding equilibrium rmsd values (10–20 ns and 10–30 ns, respectively) ( $n = 3$ ), data are expressed as means  $\pm$  SEM and no significant difference is found between the equilibrium values of the two timeframe simulations ( $P = 0.851$ ).

**Table S1.** Overall and region-specific variation in different categories of amino acids of 26 cMDH orthologs of marine molluscs as a function of enzyme stability. Amino acid categories were: charged (DEKR), weakly hydrophobic/polar (AGNQSTHY), and hydrophobic (LVWIFMPC)

|                                          | Overall                | Surface                | Intermediate           | Core                  |
|------------------------------------------|------------------------|------------------------|------------------------|-----------------------|
| <b>Charged residues</b>                  |                        |                        |                        |                       |
| Equation                                 | $Y = -7.449*X + 22.12$ | $Y = -7,139*X + 17.31$ | $Y = -0.204*X + 4.73$  | $Y = -0.156*X + 0.09$ |
| $R^2$                                    | 0.541                  | 0.397                  | <0.001                 | 0.009                 |
| $P$ value                                | <0.001                 | <0.001                 | 0.906                  | 0.646                 |
| <b>Weakly hydrophobic/polar residues</b> |                        |                        |                        |                       |
| Equation                                 | $Y = 6.283*X + 40.11$  | $Y = 6.454*X + 19.97$  | $Y = -0.846*X + 16.30$ | $Y = 0.676*X + 3.85$  |
| $R^2$                                    | 0.428                  | 0.072                  | 0.002                  | 0.009                 |
| $P$ value                                | <0.001                 | 0.185                  | 0.834                  | 0.641                 |
| <b>Hydrophobic residues</b>              |                        |                        |                        |                       |
| Equation                                 | $Y = 1.168*X + 37.78$  | $Y = -1.091*X + 11.01$ | $Y = -0.083*X + 21.33$ | $Y = 2.122*X + 5.383$ |
| $R^2$                                    | 0.035                  | 0.021                  | <0.001                 | 0.037                 |
| $P$ value                                | 0.362                  | 0.482                  | 0.969                  | 0.348                 |
| <b>Proline</b>                           |                        |                        |                        |                       |
| Equation                                 | $Y = 2.293*X + 4.29$   | $Y = 1.932*X + 2.99$   | $Y = 0.249*X + 1.17$   | $Y = 0.112*X + 0.13$  |
| $R^2$                                    | 0.182                  | 0.183                  | 0.007                  | 0.004                 |
| $P$ value                                | 0.030                  | 0.029                  | 0.679                  | 0.758                 |
| <b>Glycine</b>                           |                        |                        |                        |                       |
| Equation                                 | $Y = 2.073*X + 6.54$   | $Y = 2.241*X + 3.99$   | $Y = -0.248*X + 1.82$  | $Y = 0.181*X + 0.72$  |
| $R^2$                                    | 0.186                  | 0.209                  | 0.002                  | 0.007                 |
| $P$ value                                | 0.028                  | 0.019                  | 0.834                  | 0.694                 |

**Table S2.** The rmsd of backbone atom positions and the rms fluctuation (rmsf) for individual residues over the equilibration state (10–20 ns) determined by molecular dynamics simulations for cMDHs at the simulation temperature of 57 °C (mean  $\pm$  SEM). Two wild types, *Echinolittorina malaccana* (wt-*Em*) and *E. radiata* (wt-*Er*), and two mutants, mut-G114S (glycine mutated to serine at site 114 for the *E. malaccana* ortholog) and mut-S114G (serine mutated to glycine for the *E. radiata* ortholog) ( $n = 10$ ); two wild types, wt-*Em* and *Littorina keenae* (wt-*Lk*), and two mutants of mut-P4A (proline mutated to alanine at site 4 for the *E. malaccana* ortholog) and mut-A4P (alanine mutated to proline for the *L. keenae* ortholog) ( $n = 5$ )

| Species       | rmsd              | rmsf              |
|---------------|-------------------|-------------------|
| wt- <i>Em</i> | 2.117 $\pm$ 0.049 | 1.075 $\pm$ 0.017 |
| mut-G114S     | 1.986 $\pm$ 0.059 | 1.019 $\pm$ 0.020 |
| wt- <i>Er</i> | 2.183 $\pm$ 0.089 | 1.066 $\pm$ 0.029 |
| mut-S114G     | 2.665 $\pm$ 0.107 | 1.213 $\pm$ 0.033 |
| wt- <i>Em</i> | 2.110 $\pm$ 0.067 | 1.072 $\pm$ 0.025 |
| mut-P4A       | 2.104 $\pm$ 0.067 | 1.080 $\pm$ 0.025 |
| wt- <i>Lk</i> | 2.324 $\pm$ 0.098 | 1.151 $\pm$ 0.037 |
| mut-A4P       | 2.017 $\pm$ 0.047 | 1.037 $\pm$ 0.009 |

**Table S3.** Statistical analyses of the averaged equilibrium (10–20 ns) rmsd of backbone atom positions and averaged equilibrium rms fluctuation (rmsf) for individual residues determined by molecular dynamics simulations for cMDHs at the simulation temperature of 57 °C. Two wild types, *Echinolittorina malaccana* (wt-*Em*) and *E. radiata* (wt-*Er*), and two mutants, mut-G114S (glycine mutated to serine at site 114 for the *E. malaccana* ortholog) and mut-S114G (serine mutated to glycine for the *E. radiata* ortholog) ( $n = 10$ ); two wild types, wt-*Em* and *Littorina keenae* (wt-*Lk*), and two mutants, mut-P4A (proline mutated to alanine at site 4 for the *E. malaccana* ortholog) and mut-A4P (alanine mutated to proline for the *L. keenae* ortholog) ( $n = 5$ ). Turkey's multiple comparisons test with Prism 6.0 software (La Jolla, CA, USA) was used. Significance is denoted with asterisks: \* for  $P$  value less than 0.05, \*\* for  $P$  values less than 0.01, \*\*\* for  $P$  value less than 0.001, and ns for not significant

| Species       |               |             |               |             |
|---------------|---------------|-------------|---------------|-------------|
|               | wt- <i>Em</i> | mut-G114S   | wt- <i>Er</i> | mut-S114G   |
| wt- <i>Em</i> |               | ns          | ns            | ** 0.003    |
| mut-G114S     | ns            |             | ns            | *** < 0.001 |
| wt- <i>Er</i> | ns            | ns          |               | ** 0.001    |
| mut-S114G     | *** < 0.001   | *** < 0.001 | *** < 0.001   |             |
|               | wt- <i>Em</i> | mut-P4A     | wt- <i>Lk</i> | mut-A4P     |
| wt- <i>Em</i> |               | ns          | ns            | ns          |
| mut-P4A       | ns            |             | ns            | ns          |
| wt- <i>Lk</i> | ns            | ns          |               | * 0.029     |
| mut-A4P       | ns            | ns          | * 0.038       |             |

One-way ANOVA of rmsd value

One-way ANOVA of rmsf value



**Table S4.** Statistical analyses of the temperature-dependence of the Michaelis-Menten constant for the cofactor (reduced nicotinamide adenine dinucleotide) ( $K_M^{\text{NADH}}$ ). Three wild types *Echinolittorina malaccana* (wt-*Em*), *E. radiata* (wt-*Er*), and *Littorina keenae* (wt-*Lk*), and four mutants, mut-G114S (glycine mutated to serine at site 114 for the *E. malaccana* ortholog), mut-S114G (serine mutated to glycine for the *E. radiata* ortholog), mut-P4A (proline mutated to alanine at site 4 for the *E. malaccana* ortholog), and mut-A4P (alanine mutated to proline for the *L. keenae* ortholog) ( $n = 5$ ). The independent sample *t*-test with Prism 6.0 software (La Jolla, CA, USA) was used. Significance is denoted with asterisks: \* for *P* value less than 0.05, \*\* for *P* values less than 0.01, \*\*\* for *P* value less than 0.001, and ns for not significant

| Temperature               |               | Statistical analyses |             |               |             |             |
|---------------------------|---------------|----------------------|-------------|---------------|-------------|-------------|
|                           |               | wt- <i>Em</i>        | mut-G114S   | wt- <i>Er</i> | mut-S114G   |             |
| $K_M^{\text{NADH}}$       | 20 °C         | wt- <i>Em</i>        | -           | ns            | ns          | ns          |
|                           |               | mut-G114S            | -           | -             | ns          | ns          |
|                           |               | wt- <i>Er</i>        | -           | -             | -           | ns          |
|                           |               | mut-S114G            | -           | -             | -           | -           |
|                           | 25 °C         | wt- <i>Em</i>        | -           | * 0.033       | ns          | ** 0.002    |
|                           |               | mut-G114S            | -           | -             | ns          | ns          |
|                           |               | wt- <i>Er</i>        | -           | -             | -           | ns          |
|                           |               | mut-S114G            | -           | -             | -           | -           |
|                           | 30 °C         | wt- <i>Em</i>        | -           | * 0.029       | * 0.034     | ** 0.002    |
|                           |               | mut-G114S            | -           | -             | ns          | ** 0.007    |
|                           |               | wt- <i>Er</i>        | -           | -             | -           | * 0.049     |
|                           |               | mut-S114G            | -           | -             | -           | -           |
|                           | 35 °C         | wt- <i>Em</i>        | -           | *** < 0.001   | *** < 0.001 | *** < 0.001 |
|                           |               | mut-G114S            | -           | -             | ns          | *** < 0.001 |
|                           |               | wt- <i>Er</i>        | -           | -             | -           | * 0.010     |
|                           |               | mut-S114G            | -           | -             | -           | -           |
| 40 °C                     | wt- <i>Em</i> | -                    | *** < 0.001 | *** < 0.001   | *** < 0.001 |             |
|                           | mut-G114S     | -                    | -           | ns            | ** 0.007    |             |
|                           | wt- <i>Er</i> | -                    | -           | -             | ns          |             |
|                           | mut-S114G     | -                    | -           | -             | -           |             |
| Linear regression (slope) | wt- <i>Em</i> | -                    | * 0.017     | ** 0.002      | *** < 0.001 |             |
|                           | mut-G114S     | -                    | -           | ns            | ns          |             |
|                           | wt- <i>Er</i> | -                    | -           | -             | ns          |             |
|                           | mut-S114G     | -                    | -           | -             | -           |             |
| $K_M^{\text{NADH}}$       | 20 °C         | wt- <i>Em</i>        | -           | * 0.047       | ns          | ns          |
|                           |               | mut-P4A              | -           | -             | * 0.037     | ns          |
|                           |               | wt- <i>Lk</i>        | -           | -             | -           | ns          |
|                           |               | mut-A4P              | -           | -             | -           | -           |
|                           | 25 °C         | wt- <i>Em</i>        | -           | *** < 0.001   | * 0.047     | ** 0.008    |
|                           |               | mut-P4A              | -           | -             | ns          | ns          |
|                           |               | wt- <i>Lk</i>        | -           | -             | -           | ns          |
|                           |               | mut-A4P              | -           | -             | -           | -           |
|                           | 30 °C         | wt- <i>Em</i>        | -           | ** 0.002      | ns          | * 0.018     |
|                           |               | mut-P4A              | -           | -             | * 0.018     | * 0.025     |
|                           |               | wt- <i>Lk</i>        | -           | -             | -           | ns          |
|                           |               | mut-A4P              | -           | -             | -           | -           |
|                           | 35 °C         | wt- <i>Em</i>        | -           | *** < 0.001   | ** 0.006    | ** 0.002    |
|                           |               | mut-P4A              | -           | -             | * 0.023     | ns          |
|                           |               | wt- <i>Lk</i>        | -           | -             | -           | ns          |
|                           |               | mut-A4P              | -           | -             | -           | -           |
|                           | 40 °C         | wt- <i>Em</i>        | -           | *** < 0.001   | ** 0.004    | *** < 0.001 |
|                           |               | mut-P4A              | -           | -             | ** 0.003    | * 0.032     |
|                           |               | wt- <i>Lk</i>        | -           | -             | -           | ns          |
|                           |               | mut-A4P              | -           | -             | -           | -           |
| Linear regression (slope) | wt- <i>Em</i> | -                    | * 0.018     | ns            | ns          |             |
|                           | mut-P4A       | -                    | -           | ns            | ns          |             |
|                           | wt- <i>Lk</i> | -                    | -           | -             | ns          |             |
|                           | mut-A4P       | -                    | -           | -             | -           |             |

**Table S5.** Primers designed for cytosolic malate dehydrogenase (cMDH) cDNAs

| Primer ID   | Description                                                                                                     | Sequences (5'–3')                        |
|-------------|-----------------------------------------------------------------------------------------------------------------|------------------------------------------|
| MDF1        | Partial sequence primer for <i>Laternula elliptica</i> or <i>Adamussium colbecki</i>                            | CTGCKGGYCARATYGCYTAYT                    |
| MDR1        |                                                                                                                 | CTGCWGACATRGCACRTRGAYA                   |
| Le-5race-1  |                                                                                                                 | GATTACGCCAAGCTTTAACATCTGGATACTGGGTTGAGGA |
| Le-5race-2  | RACE primer for <i>L. elliptica</i>                                                                             | GATTACGCCAAGCTTCATGGCTCCAACCAGAATGGCTAC  |
| Le-3race-1  |                                                                                                                 | GATTACGCCAAGCTTCTTGCTAAGGGAGATGTATTTGGAC |
| Le-3race-2  |                                                                                                                 | GATTACGCCAAGCTTGATTACGCAGTTGGCTTCAAGGATG |
| Ac-5race-1  |                                                                                                                 | GATTACGCCAAGCTTCTTGACCGTGGCGTAGGAGACAT   |
| Ac-5race-2  | RACE primer of <i>A. colbecki</i>                                                                               | GATTACGCCAAGCTTTAGGCACCACATTTCTGACAAGG   |
| Ac-3race-1  |                                                                                                                 | GATTACGCCAAGCTTAGGCACAGTTGCTAATAAGTTGG   |
| Ac-3race-2  |                                                                                                                 | GATTACGCCAAGCTTTTATCAGCACTGTCCAGAAGCGAGG |
| E-F1        | Full-length primer with restriction site (underlined) for <i>Echinolittorina malaccana</i> or <i>E. radiata</i> | CCGGAATTCATGAGTGAACCAGTGAAAG             |
| E-F2        |                                                                                                                 | CCGGAATTCATGAGTGAACCAGTGAAAGTATGT        |
| E-R1        |                                                                                                                 | CCGCTCGAGTCACTGGTTGCAGATTTCTTCG          |
| E-R2        |                                                                                                                 | CCGCTCGAGTCACTGGTTGCAGATTTCTTCG          |
| Em-G114S-F1 |                                                                                                                 | TTCAAGTCCCAGGGCTCCGCCCTTGACACTGT         |
| Em-G114S-F2 | 114# mutagenesis primer for <i>E. malaccana</i> or <i>E. radiata</i> to construct the mut-G114S and mut-S114G   | CAAGTCCCAGGGCTCCGCCCTTGACACT             |
| Er-S114G-F1 |                                                                                                                 | TTCAAGTCCCAGGGCGGTGCTCTTGACACCGT         |
| Er-S114G-F2 |                                                                                                                 | CAAGTCCCAGGGCGGTGCTCTTGACACC             |
| E-114-R1    |                                                                                                                 | GATCTTGATGTTGGCTGCCAGCAGGTCCTTG          |
| E-114-R2    |                                                                                                                 | AAGATCTTGATGTTGGCTGCCAGCAGGTCCT          |
| Em-P4A-F1   |                                                                                                                 | GTAAGTGGTGCTGCTGGC                       |
| Em-P4A-R1   | 4# mutagenesis primer for <i>E. malaccana</i> to construct the mut-P4A                                          | GCATACTTTCACTGCTTCAC                     |
| Em-P4A-F2   |                                                                                                                 | TGGTGCTGCTGGCCAGATTGCT                   |
| Em-P4A-R2   |                                                                                                                 | GTTACGCATACTTTCACTGCTTCACTCAT            |
| G114A-F1    | 4# mutagenesis primer for <i>Littorina keenae</i> to construct the wt- <i>Lk</i> and mut-A4P                    | TGACACTGTGGCCAAGAAGACCGTCAAGGT           |
| G114A-R1    |                                                                                                                 | AGGGCGGCCGCCCTGGGACTTGAAGAT              |
| G114A-F2    |                                                                                                                 | ATCTTCAAGTCCCAGGGCGCCGC                  |
| G114A-R2    |                                                                                                                 | CTTGATGTTGGCTGCCAGCAGGTCCTT              |

**Table S6.** GenBank accession Numbers for 26 orthologs of molluscan cytosolic malate dehydrogenase (cMDH) sequences

| Species                         | Accession Number |
|---------------------------------|------------------|
| <i>Echinolittorina radiata</i>  | MF774407         |
| <i>E. malaccana</i>             | MF774406         |
| <i>Littorina keenae</i>         | MG256005         |
| <i>L. scutulata</i>             | MG256006         |
| <i>Nipponacmea fuscoviridis</i> | MF774412         |
| <i>N. radula</i>                | MF774413         |
| <i>Lottia gigantea</i>          | EU863455         |
| <i>L. austrodigitalis</i>       | EU863454         |
| <i>L. scabra</i>                | EU863457         |
| <i>L. digitalis</i>             | EU863452         |
| <i>L. scutum</i>                | EU863456         |
| <i>L. pelta</i>                 | EU863453         |
| <i>Chlorostoma rugosa</i>       | MG190819         |
| <i>C. funebris</i>              | MG190818         |
| <i>C. brunnea</i>               | MG190820         |
| <i>C. montereyi</i>             | MG190821         |
| <i>Nerita yoldii</i>            | MF774409         |
| <i>N. albicilla</i>             | MF774408         |
| <i>Haliotis rufescens</i>       | MG256004         |
| <i>H. diversicolor</i>          | MF774410         |
| <i>H. discus</i>                | MF774411         |
| <i>Mytilus trossulus</i>        | DQ149969         |
| <i>M. californianus</i>         | DQ149971         |
| <i>M. galloprovincialis</i>     | DQ149970         |
| <i>Laternula elliptica</i>      | MH924592         |
| <i>Adamussium colbecki</i>      | MH924591         |
